# Supplementary material for: The Solar Zenith Angle Impacts MODIS versus CALIPSO AOD Retrieval Biases, with Implications for Arctic Aerosol Seasonality
Source: Copernicus journal article supplement (doi:10.5194/egusphere-2024-3596), 2025-01-13
Supplement: Supplementary file 1 [file egusphere-2024-3596-supplement.pdf]

# **Supplemental Material for "The Solar Zenith Angle Impacts MODIS versus CALIOP Retrieval Biases, with Implications for Arctic Aerosol Seasonality"**

Sarah Smith<sup>1</sup>, Yutian Wu<sup>1</sup>, Rob Levy<sup>2</sup>, and Mingfang Ting<sup>1</sup>

<sup>1</sup>Lamont-Doherty Earth Observatory, Columbia University, New York, NY, USA

<sup>2</sup>NASA Goddard Space Flight Center, Greenbelt, MD, USA

Corresponding author: Sarah Smith (sarahs@ldeo.columbia.edu)

**Supplemental Figures**

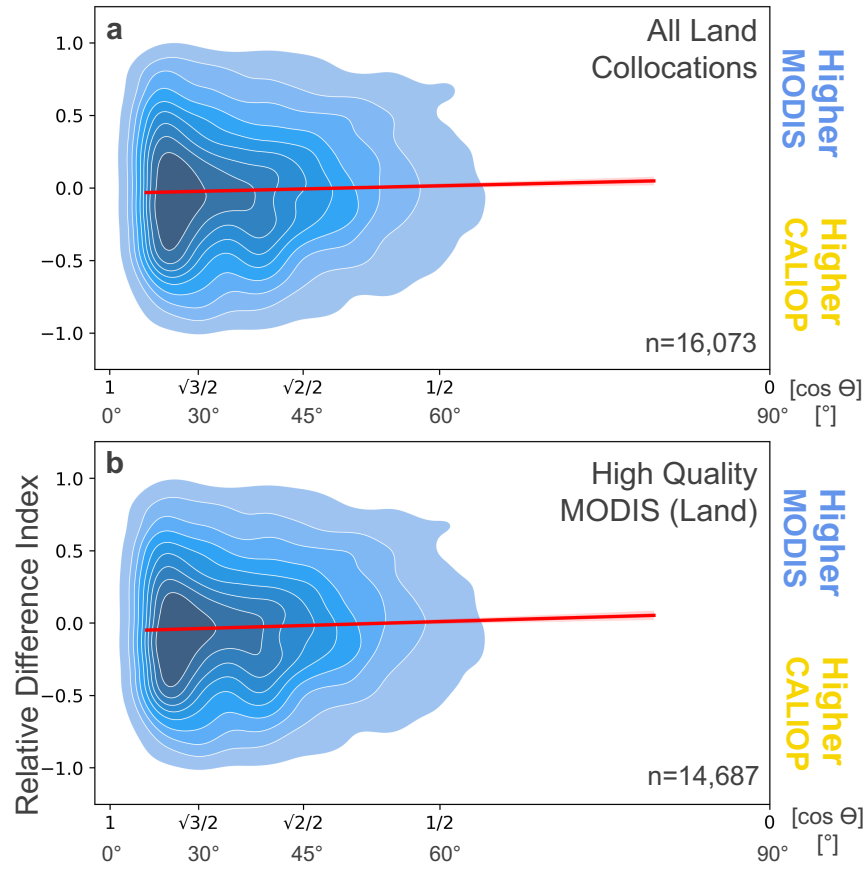

No Collocations with Low Quality  
Flags MODIS over land

**Figure S1.** Same as Fig. 7, except only for collocations that occurred over land.

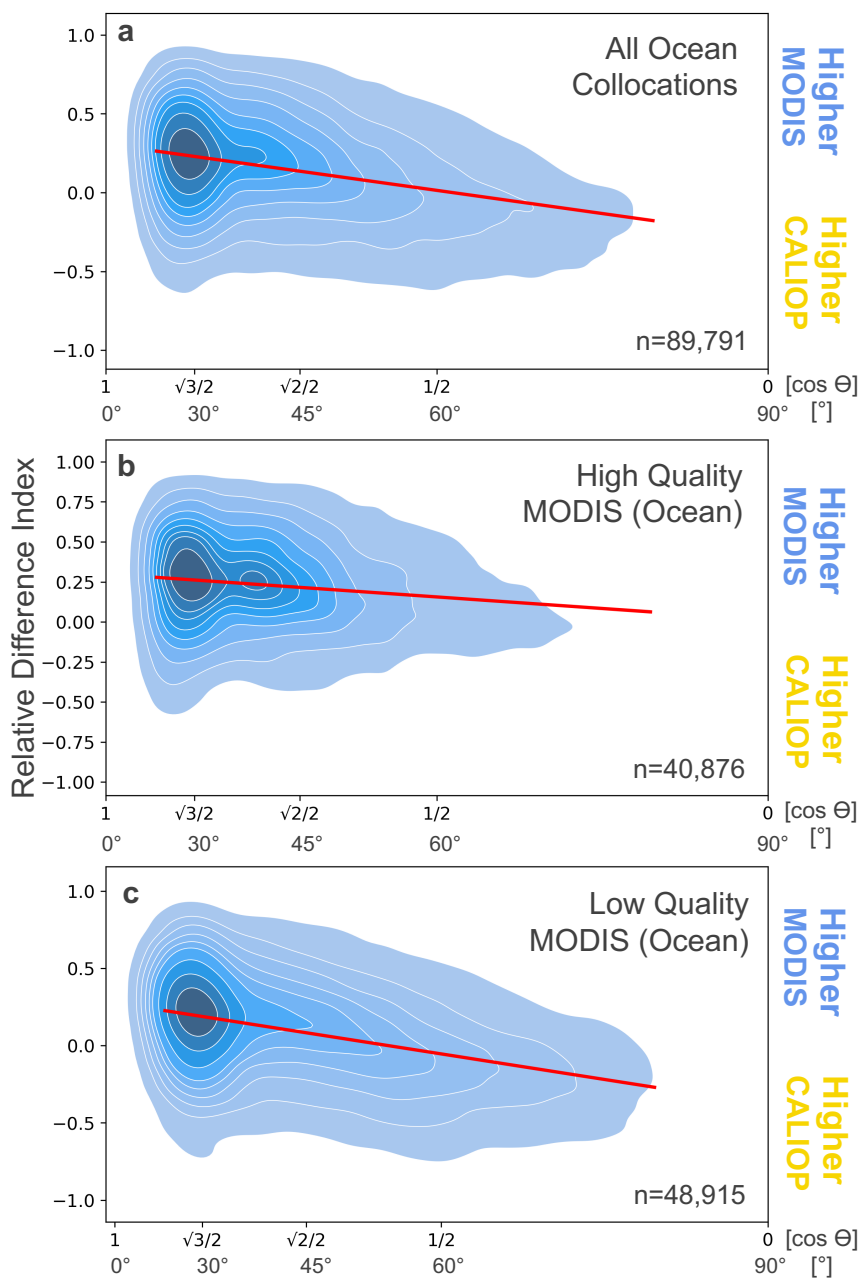

**Figure S2.** Same as Fig. 7, except only for collocations that occurred over ocean.
